# Supplementary material for: Unified metagenomic method for rapid detection of microorganisms in clinical samples
Source: PubMed Central journal article supplement (PMC11228040; doi:10.1038/s43856-024-00554-3), 2024-07-07
Supplement: 43856_2024_554_MOESM1_ESM.pdf [file 43856_2024_554_MOESM1_ESM.pdf]

## Description of Additional Supplementary Files

**File name:** Supplementary Data 1.

**File Description:** Viruses considered pathogenic.

**File name:** Supplementary Data 2.

**File Description:** URTS depletion.

**File name:** Supplementary Data 3.

**File Description:** LRT depletion.

**File name:** Supplementary Data 4.

**File Description:** Viral loss.

**File name:** Supplementary Data 5.

**File Description:** Bacteria loss.

**File name:** Supplementary Data 6.

**File Description:** RNA recovery.

**File name:** Supplementary Data 7.

**File Description:** Viral LoD

**File name:** Supplementary Data 8.

**File Description:** Bacteria LoD

**File name:** Supplementary Data 9.

**File Description:** Candida LoD

**File name:** Supplementary Data 10.

**File Description:** Viral performance.

**File name:** Supplementary Data 11.

**File Description:** Bacteria performance.

**File name:** Supplementary Data 12.

**File Description:** Candida performance.

**File name:** Supplementary Data 13.

**File Description:** Prospective samples.

**File name:** Supplementary Data 14

**File Description:** Primers

**File name:** Supplementary Data 15

**File Description:** Negative controls.
